# Supplementary material
Source: PubMed Central journal article supplement (PMC404060)

A

| Abb                         | Organism                                  | Accession                                       | Position          | Genes                                                                                     |
|-----------------------------|-------------------------------------------|-------------------------------------------------|-------------------|-------------------------------------------------------------------------------------------|
| <b>Bacillus/Clostridium</b> |                                           |                                                 |                   |                                                                                           |
| Ban                         | <i>Bacillus anthracis</i>                 | NC_003997.3                                     | + 1510409 1510555 | <b>BA1605</b> <b>COG0474</b>                                                              |
| Bce                         | <i>Bacillus cereus</i>                    | NC_004722.1                                     | + 1527922 1528069 | <b>BC1581</b> <b>COG0474</b>                                                              |
| Bce                         | <i>Bacillus cereus</i>                    | NC_004722.1                                     | + 4103599 4103748 | <b>BC4140</b> <b>COG0474</b> <b>BC4141</b> <b>COG1285</b>                                 |
| Bha                         | <i>Bacillus halodurans</i>                | NC_002570.1                                     | + 2041950 2042097 | <b>BH1946</b> <b>COG3464</b> <b>BH1947</b> <b>COG2239</b> <b>BH1948</b> <b>COG2239</b>    |
| Bha                         | <i>Bacillus halodurans</i>                | NC_002570.1                                     | - 3340848 3340994 | <b>BH3226</b> ----- <b>BH3225</b> <b>COG1285</b> <b>BH3224</b> <b>COG2239</b>             |
| Bha                         | <i>Bacillus halodurans</i>                | NC_002570.1                                     | - 3340396 3340541 | <b>BH3225</b> <b>COG1285</b> <b>BH3224</b> <b>COG2239</b>                                 |
| Bsu                         | <i>Bacillus subtilis</i>                  | NC_000964.1                                     | + 1395090 1395237 | <b>ykoK</b> <b>COG2239</b>                                                                |
| Cac                         | <i>Clostridium acetobutylicum</i>         | NC_003030.1                                     | + 789416 789571   | <b>CAC0683</b> ----- <b>CAC0684</b> <b>COG2239</b> <b>CAC0685</b> <b>COG1914</b>          |
| Cac                         | <i>Clostridium acetobutylicum</i>         | NC_003030.1                                     | - 3501692 3501837 | <b>CAC3329</b> <b>COG1914</b>                                                             |
| Cth                         | <i>Clostridium thermocellum</i>           | NZ_AABG02000025.1                               | + 30891 31039     | <b>chte1267</b> <b>COG0598</b>                                                            |
| Efa                         | <i>Enterococcus faecalis</i>              | NC_004668.1                                     | + 1268274 1268425 | <b>EF1304</b> <b>COG0474</b>                                                              |
| Lga                         | <i>Lactobacillus gasseri</i>              | ZP_00046151.1                                   | + 78545 78693     | <b>Lgas0315</b> <b>COG0474</b>                                                            |
| Lin                         | <i>Listeria innocua</i>                   | NC_003212.1                                     | - 2855176 2855325 | <b>lin2836</b> <b>COG0474</b> <b>lin2835</b> <b>COG0772</b> <b>Lin2834</b> <b>COG0772</b> |
| Lmo                         | <i>Listeria monocytogenes</i>             | NC_003210.1                                     | - 2765947 2766095 | <b>lmo2689</b> <b>COG0474</b> <b>lmo2688</b> <b>COG0772</b> <b>lmo2687</b> <b>COG0772</b> |
| Tte                         | <i>Thermoanaerobacter tengcongensis</i>   | NC_003869.1                                     | - 2397961 2398107 | <b>TTE2510</b> ----- <b>TTE2509</b> <b>COG0474</b>                                        |
| <b>Actinobacteria</b>       |                                           |                                                 |                   |                                                                                           |
| Mbo                         | <i>Mycobacterium bovis</i>                | NC_002945.3                                     | + 1719531 1719680 | <b>Mb1562</b> -----                                                                       |
| Mle                         | <i>Mycobacterium leprae</i>               | NC_002677.1                                     | - 3196999 3197092 | <b>ML2667</b> <b>COG1914</b>                                                              |
| Msm                         | <i>Mycobacterium smegmatis</i>            |                                                 | - 1484907 1485062 | <b>(mgtA)</b> <b>COG0474</b>                                                              |
|                             | (gnl TIGR_246196 contig:3312:m_smegmatis) |                                                 |                   |                                                                                           |
| Mtu                         | <i>Mycobacterium tuberculosis</i>         | NC_000962.1                                     | + 1735516 1735665 | <b>Rv1535</b> -----                                                                       |
| <b>Beta Proteobacteria</b>  |                                           |                                                 |                   |                                                                                           |
| Cvi                         | <i>Chromobacterium violaceum</i>          | NC_005085.1                                     | + 3525136 3525282 | <b>mgtE</b> <b>COG2239</b>                                                                |
| <b>Gamma Proteobacteria</b> |                                           |                                                 |                   |                                                                                           |
| Vch                         | <i>Vibrio cholerae</i> chr I              | NC_002505.1                                     | + 1786711 1786862 | <b>VC1655</b> <b>COG2239</b>                                                              |
| <b>COG</b>                  | <b>Gene</b>                               | <b>Description</b>                              |                   |                                                                                           |
| <b>COG2239</b>              | <b>BS_ykoK</b>                            | Mg/Co/Ni transporter MgtE (contains CBS domain) |                   |                                                                                           |
| <b>COG1914</b>              | <b>mntA</b>                               | Mn2+ and Fe2+ transporters of the NRAMP family  |                   |                                                                                           |
| <b>COG1285</b>              | <b>yhiD</b>                               | Uncharacterized membrane protein                |                   |                                                                                           |
| <b>COG0474</b>              | <b>mgtA</b>                               | Cation transport ATPase                         |                   |                                                                                           |
| <b>COG0772</b>              | <b>ftsW</b>                               | Bacterial cell division membrane protein        |                   |                                                                                           |
| <b>COG0598</b>              | <b>corA</b>                               | Mg2+ and Co2+ transporters                      |                   |                                                                                           |
| <b>COG3464</b>              | -                                         | Transposase and inactivated derivatives         |                   |                                                                                           |



C

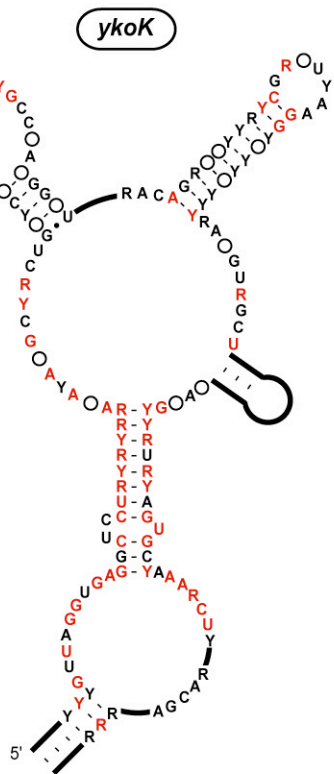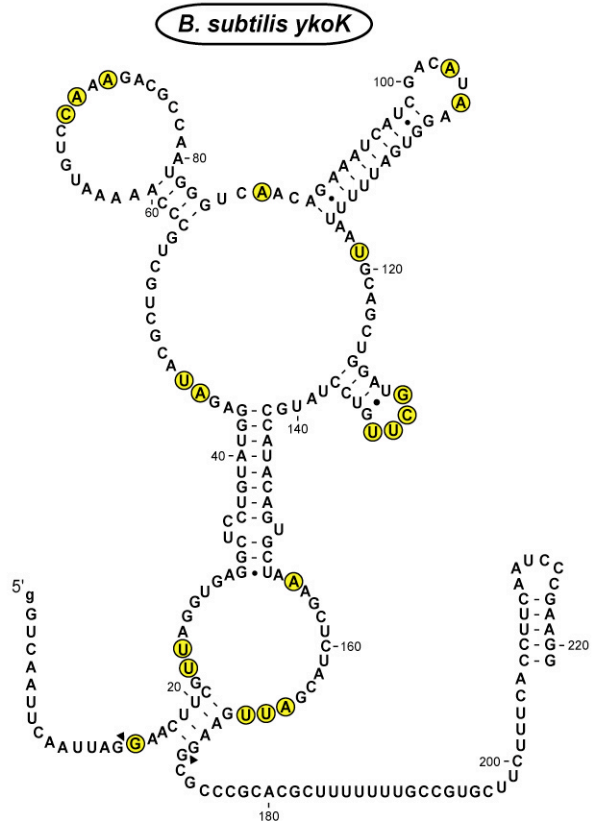

*B. subtilis*  
**ykoK**

NR T1 OH -

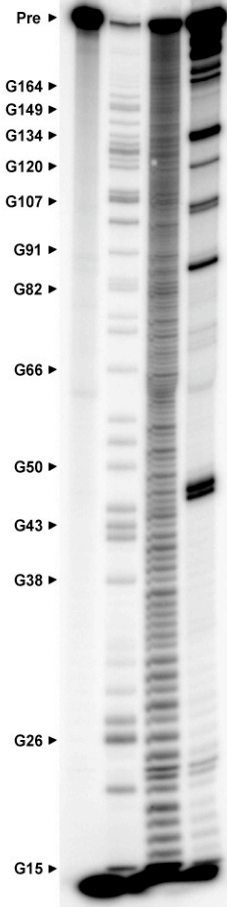

Supplement: pnas_101_17_6421__5.pdf [file pnas_101_17_6421__5.pdf]
