# Supplementary material
Source: PubMed Central journal article supplement (PMC404060)

A

| Abb                         | Organism                                | Accession       | Position          | Genes                                                                                     |
|-----------------------------|-----------------------------------------|-----------------|-------------------|-------------------------------------------------------------------------------------------|
| <b>Bacillus/Clostridium</b> |                                         |                 |                   |                                                                                           |
| Ban                         | <i>Bacillus anthracis</i>               | NC_003997.3     | + 824029 824109   | <b>BA0809</b> <b>COG3339</b> <i>dedA</i> <b>COG0586</b>                                   |
| Ban                         | <i>Bacillus anthracis</i>               | NC_003997.3     | - 1269052 1269154 | <b>BA1322</b> <b>COG0861</b>                                                              |
| Bha                         | <i>Bacillus halodurans</i>              | NC_002570.1     | - 2677841 2677933 | <b>BH2553</b> <b>COG0861</b>                                                              |
| Bsu                         | <i>Bacillus subtilis</i>                | NC_000964.1     | + 1410104 1410202 | <b>ykoY</b> <b>COG0861</b>                                                                |
| Bsu                         | <i>Bacillus subtilis</i>                | NC_000964.1     | - 4169043 4169122 | <b>yybP</b> -----                                                                         |
| Cpe                         | <i>Clostridium perfringens</i>          | NC_003366.1     | - 421415 421495   | <b>CPE0333</b> <b>COG0474</b>                                                             |
| Cpe                         | <i>Clostridium perfringens</i>          | NC_003366.1     | + 665199 665285   | <b>CPE0535</b> <b>COG1971</b>                                                             |
| Dha                         | <i>Desulfitobacterium hafniense</i>     | NZ_AA02000220.1 | - 1350 1427       | <b>Desu0831</b> <b>COG0861</b>                                                            |
| Lla                         | <i>Lactococcus lactis</i>               | NC_002662.1     | - 1405837 1405926 | <b>yoaB</b> <b>COG0474</b>                                                                |
| Lpl                         | <i>Lactobacillus plantarum</i>          | NC_004567.1     | + 523159 523235   | <b>pacL2</b> <b>COG0474</b>                                                               |
| Lin                         | <i>Listeria innocua</i>                 | NC_003212.1     | + 1013076 1013174 | <b>lin0990</b> <b>COG0861</b> <i>lin0991</i> <b>COG0861</b> <i>lin0992</i> <b>COG0168</b> |
| Lmo                         | <i>Listeria monocytogenes</i>           | NC_003210.1     | + 1021476 1021575 | <b>lmo0991</b> <b>COG0861</b> <i>lmo0992</i> <b>COG0861</b> <i>lmo0993</i> <b>COG0168</b> |
| Oih                         | <i>Oceanobacillus iheyensis</i>         | NC_004193.1     | - 1328491 1328574 | <b>OB1286</b> ----- <b>OB1285</b> <b>COG0515</b>                                          |
| Oih                         | <i>Oceanobacillus iheyensis</i>         | NC_004193.1     | - 3147546 3147625 | <b>OB3036</b> <b>COG0861</b>                                                              |
| Sau                         | <i>Staphylococcus aureus</i>            | NC_002745.1     | + 995888 995990   | <b>SA0878</b> <b>COG0861</b>                                                              |
| Sep                         | <i>Staphylococcus epidermidis</i>       | NC_004461.1     | + 711305 711434   | <b>SE0721</b> <b>COG0861</b>                                                              |
| Sag                         | <i>Streptococcus agalactiae</i>         | NC_004116.1     | + 526370 526445   | <b>SAG0514</b> <b>COG0474</b>                                                             |
| Smu                         | <i>Streptococcus mutans</i>             | NC_004350.1     | + 681851 681927   | <b>SMU_723</b> <b>COG0474</b>                                                             |
| Spn                         | <i>Streptococcus pneumoniae</i>         | NC_003028.1     | - 1461088 1461178 | <b>SP1551</b> <b>COG0474</b>                                                              |
| Spy                         | <i>Streptococcus pyogenes</i>           | NC_002737.1     | + 500062 500139   | <b>pacL</b> <b>COG0474</b>                                                                |
| Tte                         | <i>Thermoanaerobacter tengcongensis</i> | NC_003869.1     | + 36548 36622     | <b>MgtA4</b> <b>COG0474</b>                                                               |
| Tte                         | <i>Thermoanaerobacter tengcongensis</i> | NC_003869.1     | + 255482 255587   | <b>OadB</b> <b>COG1883</b>                                                                |
| <b>Cyanobacteria</b>        |                                         |                 |                   |                                                                                           |
| Nos                         | <i>Nostoc</i>                           | NC_003272.1     | + 2037117 2037211 | <b>a1r1698</b> <b>COG2119</b>                                                             |
| <b>Alpha Proteobacteria</b> |                                         |                 |                   |                                                                                           |
| Ccr                         | <i>Caulobacter crescentus</i>           | NC_002696.2     | - 2571360 2571465 | <b>CC2370</b> <b>COG2119</b>                                                              |
| <b>Beta Proteobacteria</b>  |                                         |                 |                   |                                                                                           |
| Rso                         | <i>Ralstonia solanacearum</i>           | NC_003295.1     | - 997656 997775   | <b>RSc0949</b> <b>COG0861</b>                                                             |
| Rso                         | <i>Ralstonia solanacearum</i>           | NC_003295.1     | + 2274752 2274883 | <b>RSc2100</b> <b>COG2119</b>                                                             |
| <b>Gamma Proteobacteria</b> |                                         |                 |                   |                                                                                           |
| Eco                         | <i>Escherichia coli</i>                 | NC_000913.1     | + 1903494 1903590 | <b>b1821</b> <b>COG1971</b>                                                               |
| Eco                         | <i>Escherichia coli</i>                 | NC_000913.1     | + 3236021 3236135 | <b>ygjT</b> <b>COG0861</b>                                                                |
| Pae                         | <i>Pseudomonas aeruginosa</i>           | NC_002516.1     | - 3265282 3265372 | <b>PA2910</b> <b>COG1971</b>                                                              |
| Ppu                         | <i>Pseudomonas putida</i>               | NC_002947.3     | - 875969 876104   | <b>PP0760</b> <b>COG2119</b>                                                              |
| Psy                         | <i>Pseudomonas syringae</i>             | NC_004578.1     | - 1255691 1255806 | <b>PSPT01145</b> <b>COG2119</b>                                                           |
| Psy                         | <i>Pseudomonas syringae</i>             | NC_004578.1     | + 4244896 4244988 | <b>PSPT03755</b> <b>COG1971</b>                                                           |
| Sen                         | <i>Salmonella enterica</i>              | NC_003198.1     | + 1853550 1853646 | <b>STY1963</b> <b>COG1971</b>                                                             |
| Sen                         | <i>Salmonella enterica</i>              | NC_003198.1     | + 3249576 3249690 | <b>STY3404</b> <b>COG0861</b>                                                             |
| Sty                         | <i>Salmonella typhimurium</i>           | NC_003197.1     | + 1931945 1932041 | <b>yebN</b> <b>COG1971</b>                                                                |
| Sty                         | <i>Salmonella typhimurium</i>           | NC_003197.1     | + 3392075 3392189 | <b>ygjT</b> <b>COG0861</b>                                                                |
| Sfl                         | <i>Shigella flexneri</i>                | NC_004337.1     | - 1443956 1444052 | <b>yebN</b> <b>COG1971</b>                                                                |
| Sfl                         | <i>Shigella flexneri</i>                | NC_004337.1     | + 3228618 3228732 | <b>ygjT</b> <b>COG0861</b>                                                                |
| Son                         | <i>Shewanella oneidensis</i>            | NC_004347.1     | - 1112147 1112263 | <b>SO1071</b> <b>COG2119</b>                                                              |
| Vch                         | <i>Vibrio cholerae</i> chr I            | NC_002505.1     | + 20094 20199     | <b>VC0022</b> <b>COG2119</b>                                                              |
| Vch                         | <i>Vibrio cholerae</i> chr II           | NC_002506.1     | + 484083 484181   | <b>VCA0546</b> <b>COG0861</b>                                                             |
| Vvu                         | <i>Vibrio vulnificus</i> chr I          | NC_004459.1     | - 990603 990713   | <b>VV10988</b> <b>COG2119</b>                                                             |
| Vvu                         | <i>Vibrio vulnificus</i> chr II         | NC_004460.1     | + 268169 268307   | <b>VV20239</b> <b>COG0861</b>                                                             |
| Vvu                         | <i>Vibrio vulnificus</i> chr II         | NC_004460.1     | - 559562 559653   | <b>VV20505</b> <b>COG0530</b>                                                             |
| Xax                         | <i>Xanthomonas axonopodis</i>           | NC_003919.1     | + 4930332 4930424 | <b>XAC4192</b> <b>COG1971</b>                                                             |
| Xax                         | <i>Xanthomonas axonopodis</i>           | NC_003919.1     | + 5161397 5161491 | <b>ygjT</b> <b>COG0861</b>                                                                |
| Xca                         | <i>Xanthomonas campestris</i>           | NC_003902.1     | + 4836456 4836549 | <b>XCC4075</b> <b>COG1971</b>                                                             |
| Xca                         | <i>Xanthomonas campestris</i>           | NC_003902.1     | + 5057779 5057873 | <b>ygjT</b> <b>COG0861</b>                                                                |
| Ype                         | <i>Yersinia pestis</i>                  | NC_003143.1     | - 1999981 2000102 | <b>YPO1754</b> <b>COG1971</b>                                                             |
| <b>Actinobacteria</b>       |                                         |                 |                   |                                                                                           |
| Blo                         | <i>Bifidobacterium longum</i>           | NC_004307.1     | + 1260972 1261083 | <b>pacL2</b> <b>COG0474</b>                                                               |
| Cef                         | <i>Corynebacterium efficiens</i>        | NC_004369.1     | - 1962455 1962574 | <b>CE1859</b> <b>COG0861</b>                                                              |
| Cgl                         | <i>Corynebacterium glutamicum</i>       | NC_003450.2     | + 1548576 1548716 | <b>Cg11469</b> <b>COG1971</b> <i>Cg11470</i> <b>COG0798</b>                               |
| Cgl                         | <i>Corynebacterium glutamicum</i>       | NC_003450.2     | - 2072953 2073094 | <b>Cg11967</b> <b>COG0861</b>                                                             |
| Cgl                         | <i>Corynebacterium glutamicum</i>       | NC_003450.2     | - 2677230 2677318 | <b>NCg12442</b> ----- <i>Cg12528</i> <b>COG1321</b>                                       |
| Mtu                         | <i>Mycobacterium tuberculosis</i>       | NC_000962.1     | + 4322182 4322263 | <b>Rv3848</b> <b>COG2119</b>                                                              |
| Sco                         | <i>Streptomyces coelicolor</i>          | NC_003888.1     | - 2517535 2517629 | <b>SCC8A.05c</b> <b>COG2119</b>                                                           |

**A**

| COG     | Gene           | Description                                                                              |
|---------|----------------|------------------------------------------------------------------------------------------|
| COG0861 | <i>terC</i>    | possibly involved in tellurium resistance                                                |
| COG0474 | <i>mgtA</i>    | Cation transport ATPases                                                                 |
| COG1971 | -              | Predicted membrane protein                                                               |
| COG2119 | -              | Predicted membrane protein                                                               |
| COG0168 | <i>trkG</i>    | Trk-type K <sup>+</sup> transport systems, membrane components                           |
| COG1883 | -              | Na <sup>+</sup> -transporting methylmalonyl-CoA/oxaloacetate decarboxylase, beta subunit |
| COG0586 | <i>dedA</i>    | Uncharacterized membrane-associated protein                                              |
| COG0798 | <i>ACR3</i>    | Arsenite efflux pump ACR3 and related permeases                                          |
| COG0530 | <i>yrbG</i>    | Ca <sup>2+</sup> /Na <sup>+</sup> antiporter                                             |
| COG3339 | -              | Conserved hypothetical                                                                   |
| COG0515 | <i>BS_yabT</i> | Serine/threonine protein kinases                                                         |
| COG1321 | <i>troR</i>    | Mn-dependent transcriptional regulator                                                   |





C

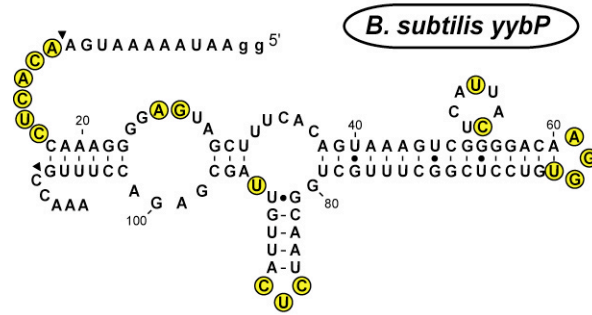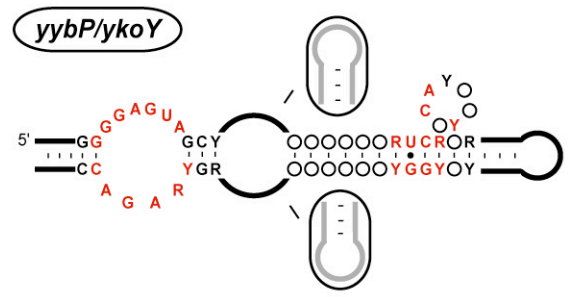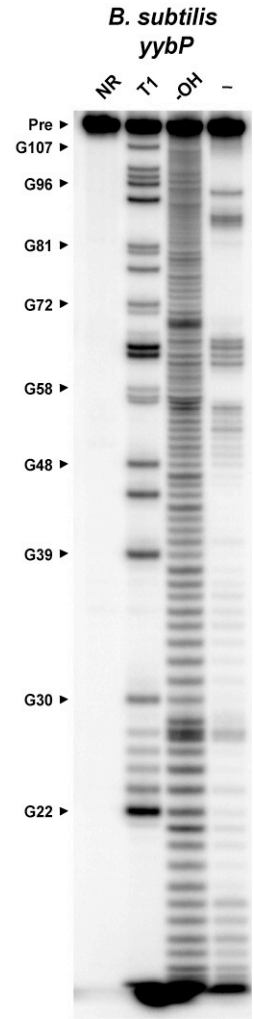

Supplement: pnas_101_17_6421__6.pdf [file pnas_101_17_6421__6.pdf]
