# Supplementary material
Source: PubMed Central journal article supplement (PMC404060)
Supplement: pnas_101_17_6421__2.pdf [file pnas_101_17_6421__2.pdf]

A

| Abb                         | Organism                          | Accession         | Position          | Genes                                                                                                                                                            |
|-----------------------------|-----------------------------------|-------------------|-------------------|------------------------------------------------------------------------------------------------------------------------------------------------------------------|
| <b>Bacillus/Clostridium</b> |                                   |                   |                   |                                                                                                                                                                  |
| # Bha                       | <i>Bacillus halodurans</i>        | NC_002570.1       | - 2941523 2941593 | <i>BH2816</i> <a href="#">COG0404</a> <i>BH2815</i> <a href="#">COG0403</a> <i>BH2814</i> <a href="#">COG1003</a>                                                |
| # Bsu                       | <i>Bacillus subtilis</i>          | NC_000964.1       | - 2548793 2548870 | <i>yqhI</i> <a href="#">COG0404</a> <i>yqhJ</i> <a href="#">COG0403</a> <i>yqhK</i> <a href="#">COG1003</a>                                                      |
| # Lin                       | <i>Listeria innocua</i>           | NC_003212.1       | + 1379638 1379705 | <i>lin1385</i> <a href="#">COG0404</a> <i>lin1386</i> <a href="#">COG0403</a> <i>lin1387</i> <a href="#">COG1003</a>                                             |
| # Lmo                       | <i>Listeria monocytogenes</i>     | NC_003210.1       | + 1936246 1936313 | <i>lmo1348</i> <a href="#">COG0404</a> <i>lmo1349</i> <a href="#">COG0403</a> <i>lmo1350</i> <a href="#">COG1003</a>                                             |
| # Oih                       | <i>Oceanobacillus iheyensis</i>   | NC_004193.1       | - 1936246 1936313 | <i>OB1904</i> <a href="#">COG0404</a> <i>OB1903</i> <a href="#">COG0403</a> <i>OB1902</i> <a href="#">COG1003</a>                                                |
| # Sau                       | <i>Staphylococcus aureus</i>      | NC_002745.1       | - 1576878 1576951 | <i>SA1367</i> <a href="#">COG0404</a> <i>SA1366</i> <a href="#">COG0403</a> <i>SA1365</i> <a href="#">COG1003</a>                                                |
| * Cac                       | <i>Clostridium acetobutylicum</i> | NC_003030.1       | - 1621894 1621959 | <i>CAC1472</i> <a href="#">COG1115</a>                                                                                                                           |
| * Cte                       | <i>Clostridium tetani</i>         | NC_004557.1       | - 2100508 2100583 | <i>CTC01975</i> <a href="#">COG1115</a>                                                                                                                          |
| * Smu                       | <i>Streptococcus mutans</i>       | NC_004350.1       | + 1115974 1116035 | <i>SMU.1175</i> <a href="#">COG1115</a>                                                                                                                          |
| * Spn                       | <i>Streptococcus pneumoniae</i>   | NC_003028.1       | + 387505 387569   | <i>SP0408</i> <a href="#">COG1115</a>                                                                                                                            |
| * Spy                       | <i>Streptococcus pyogenes</i>     | NC_002737.1       | + 1046454 1046516 | <i>SPy1270</i> <a href="#">COG1115</a>                                                                                                                           |
| <b>Alpha Proteobacteria</b> |                                   |                   |                   |                                                                                                                                                                  |
| # Atu                       | <i>Agrobacterium tumefaciens</i>  | NC_003304.1       | - 1462303 1462366 | <i>gcvT</i> <a href="#">COG0404</a> <i>gcvH</i> <a href="#">COG0509</a> <i>gcvP</i> <a href="#">COG1003</a>                                                      |
| # Bja                       | <i>Bradyrhizobium japonicum</i>   | NC_004463.1       | + 6318654 6318705 | <i>gcvT</i> <a href="#">COG0404</a> <i>gcvH</i> <a href="#">COG0509</a> <i>gcvP</i> <a href="#">COG1003</a>                                                      |
| # Bme                       | <i>Brucella melitensis</i> chr II | NC_003318.1       | + 584402 584462   | <i>BMEII0559</i> <a href="#">COG0404</a> <i>BMEII0560</i> <a href="#">COG0509</a> <i>BMEII0561</i> <a href="#">COG1003</a>                                       |
| # Brs                       | <i>Brucella suis</i> chr II       | NC_004311.1       | - 713331 713391   | <i>gcvT</i> <a href="#">COG0404</a> <i>gcvH</i> <a href="#">COG0509</a> <i>gcvP</i> <a href="#">COG1003</a>                                                      |
| # Ccr                       | <i>Caulobacter crescentus</i>     | NC_002696.2       | - 3606442 3603508 | <i>CC3355</i> <a href="#">COG0404</a> <i>CC3354</i> <a href="#">COG0509</a> <i>CC3353</i> <a href="#">COG0403</a> <a href="#">CC3352</a> <a href="#">COG1003</a> |
| # Mlo                       | <i>Mesorhizobium loti</i>         | NC_002678.1       | + 707702 707764   | <i>mlr0883</i> <a href="#">COG0404</a> <i>mlr0884</i> <a href="#">COG0509</a> <i>mlr0885</i> <a href="#">COG1003</a>                                             |
| # Mlo                       | <i>Mesorhizobium loti</i> pMLa    | NC_002679.1       | + 179384 179449   | <i>mlr9201</i> <a href="#">COG0665</a> <i>msr9402</i> <a href="#">COG3193</a>                                                                                    |
| # Rpa                       | <i>Rhodopseudomonas palustris</i> | NZ_AAAF01000001.1 | + 379419 379484   | <i>Rpa10333</i> <a href="#">COG0404</a> <i>rpa10334</i> <a href="#">COG0509</a> <i>Rpa10335</i> <a href="#">COG1003</a>                                          |
| # Sme                       | <i>Sinorhizobium meliloti</i>     | NC_003047.1       | - 1674916 1674979 | <i>gcvT</i> <a href="#">COG0404</a> <i>gcvH</i> <a href="#">COG0509</a> <i>gcvP</i> <a href="#">COG1003</a>                                                      |
| <b>Beta Proteobacteria</b>  |                                   |                   |                   |                                                                                                                                                                  |
| # Rso                       | <i>Ralstonia solanacearum</i>     | NC_003295.1       | + 3545587 3545660 | <i>gcvT</i> <a href="#">COG0404</a> <i>gcvH</i> <a href="#">COG0509</a> <i>gcvP</i> <a href="#">COG1003</a>                                                      |
| <b>Gamma Proteobacteria</b> |                                   |                   |                   |                                                                                                                                                                  |
| * Vch                       | <i>Vibrio cholerae</i> chr I      | NC_002505.1       | - 1520438 1520513 | <i>VC1422</i> <a href="#">COG1115</a>                                                                                                                            |
| * Vvu                       | <i>Vibrio vulnificus</i> chr I    | NC_004459.1       | + 2743961 2744036 | <i>VV12695</i> <a href="#">COG1115</a>                                                                                                                           |
| <b>Actinobacteria</b>       |                                   |                   |                   |                                                                                                                                                                  |
| # Mtu                       | <i>Mycobacterium tuberculosis</i> | NC_000962.1       | - 79214 79280     | <i>glyA2</i> <a href="#">COG0112</a> <i>sdaA</i> <a href="#">COG1760</a>                                                                                         |
| # Mtu                       | <i>Mycobacterium tuberculosis</i> | NC_000962.1       | + 2075623 2075696 | <i>gcvB</i> <a href="#">COG1003</a>                                                                                                                              |
| # Sco                       | <i>Streptomyces coelicolor</i>    | NC_003888.1       | - 1457856 1457927 | <i>SC10A9.20c</i> <a href="#">COG1003</a>                                                                                                                        |
| # Sco                       | <i>Streptomyces coelicolor</i>    | NC_003888.1       | - 5959014 5959083 | <i>gcvI</i> <a href="#">COG0404</a> <i>gcvH</i> <a href="#">COG0509</a> <i>glyA2</i> <a href="#">COG0112</a> <i>sdaA</i> <a href="#">COG1760</a>                 |

Type I = #, Type II = \*

| COG                     | Gene          | Description                                                                            |
|-------------------------|---------------|----------------------------------------------------------------------------------------|
| <a href="#">COG0403</a> | <i>gcvP_1</i> | Glycine cleavage system protein P (pyridoxal-binding), N-terminal domain               |
| <a href="#">COG1003</a> | <i>gcvP_2</i> | Glycine cleavage system protein P (pyridoxal-binding), C-terminal domain               |
| <a href="#">COG0404</a> | <i>gcvI</i>   | Glycine cleavage system T protein (aminomethyltransferase)                             |
| <a href="#">COG0509</a> | <i>gcvH</i>   | Glycine cleavage system H protein (lipoate-binding)                                    |
| <a href="#">COG1115</a> | <i>yaaJ</i>   | Na <sup>+</sup> /alanine symporter                                                     |
| <a href="#">COG0112</a> | <i>glyA</i>   | Glycine/serine hydroxymethyltransferase                                                |
| <a href="#">COG1760</a> | <i>sdaA</i>   | L-serine deaminase                                                                     |
| <a href="#">COG1113</a> | <i>ansP</i>   | Gamma-aminobutyrate permease and related permeases                                     |
| <a href="#">COG0665</a> | <i>dadA</i>   | Glycine/D-amino acid oxidases (deaminating)                                            |
| <a href="#">COG3193</a> | <i>glcG</i>   | Uncharacterized protein, possibly involved in utilization of glycolate and propanediol |
