# Supplementary material
Source: PubMed Central journal article supplement (PMC404060)
Supplement: pnas_101_17_6421__4.pdf [file pnas_101_17_6421__4.pdf]

A

| Abb                           | Organism                                | Accession                                                                           | Position          | Genes                                                                                                                                                                                                        |
|-------------------------------|-----------------------------------------|-------------------------------------------------------------------------------------|-------------------|--------------------------------------------------------------------------------------------------------------------------------------------------------------------------------------------------------------|
| <b>Bacillus/Clostridium</b>   |                                         |                                                                                     |                   |                                                                                                                                                                                                              |
| Bsu                           | <i>Bacillus subtilis</i>                | NC_000964.1                                                                         | + 1375803 1375900 | <i>ykkC</i> <a href="#">COG2076</a> <i>ykkD</i> <a href="#">COG2076</a>                                                                                                                                      |
| Bsu                           | <i>Bacillus subtilis</i>                | NC_000964.1                                                                         | - 3987634 3987722 | <i>yxD</i> <a href="#">COG1284</a>                                                                                                                                                                           |
| Oih                           | <i>Oceanobacillus iheyensis</i>         | NC_004193.1                                                                         | - 3401641 3401723 | <i>OB3264</i> <a href="#">COG2076</a> <i>OB3263</i> <a href="#">COG2076</a>                                                                                                                                  |
| Bha                           | <i>Bacillus halodurans</i>              | NC_002570.1                                                                         | - 741877 741966   | <i>BH0686</i> <a href="#">COG2076</a> <i>BH0685</i> <a href="#">COG2076</a>                                                                                                                                  |
| Tte                           | <i>Thermoanaerobacter tengcongensis</i> | NC_003869.1                                                                         | + 586463 586553   | <i>TTE0584</i> <a href="#">COG2252</a>                                                                                                                                                                       |
| Gst                           | <i>Geobacillus stearothermophilus</i>   | gnl OUACGT_1422 bstearo.fasta.screen.Contig257                                      | + 8552 8641       | <i>NA</i>                                                                                                                                                                                                    |
| <b>Cyanobacteria</b>          |                                         |                                                                                     |                   |                                                                                                                                                                                                              |
| Syn                           | <i>Synechocystis</i>                    | NC_000911.1                                                                         | - 801282 801389   | <i>speB</i> <a href="#">COG0010</a>                                                                                                                                                                          |
| <b>Alpha Proteobacteria</b>   |                                         |                                                                                     |                   |                                                                                                                                                                                                              |
| Rpa                           | <i>Rhodopseudomonas palustris</i>       | NZ_AAAF01000001.1                                                                   | - 3051748 3051838 | <i>Rpa12681</i> <a href="#">COG0715</a> <i>Rpa12680</i> <a href="#">COG0600</a> <i>Rpa12679</i> <a href="#">COG1116</a> <i>Rpa12678</i> <a href="#">COG3665</a> <i>Rpa12677</i> <a href="#">COG3665</a>      |
| Rle                           | <i>Rhizobium leguminosarum</i>          | gnl Sanger_216596 rhiz361f07.slk                                                    | + 9906 10000      | - <a href="#">COG0715</a> ... ?                                                                                                                                                                              |
| <b>Beta Proteobacteria</b>    |                                         |                                                                                     |                   |                                                                                                                                                                                                              |
| Bfu                           | <i>Burkholderia fungorum</i>            | NZ_AAAJ020000045                                                                    | - 41546 41664     | <i>Bcep4105</i> <a href="#">COG3665</a> <i>Bcep4104</i> <a href="#">COG3665</a> <i>Bcep4103</i> <a href="#">COG4770</a> <i>Bcep4102</i> <a href="#">COG0154</a> <i>Bcep4101</i> <a href="#">COG0600</a>      |
| Bfu                           | <i>Burkholderia fungorum</i>            | NZ_AAAJ020000045                                                                    | + 44724 44857     | <i>Bcep4100</i> <a href="#">COG1116</a> <i>Bcep4109</i> <a href="#">COG0715</a>                                                                                                                              |
| Bce                           | <i>Burkholderia cenocepacia</i>         | gnl Sanger_216591 Bcep1157h02.pic                                                   | - 576042 576159   | - <a href="#">COG3665</a> ... ?                                                                                                                                                                              |
| Neu                           | <i>Nitrosomonas europaea</i>            | NC_004757.1                                                                         | + 2634433 2634522 | <i>NE2420</i> <a href="#">COG4770</a>                                                                                                                                                                        |
| Neu                           | <i>Nitrosomonas europaea</i>            | NC_004757.1                                                                         | - 2634103 2634191 | <i>NE2419</i> <a href="#">COG0531</a> <i>NE2418</i> <a href="#">COG3665</a> <i>NE2417</i> <a href="#">COG3665</a> <i>NE2416</i> <a href="#">COG1984</a>                                                      |
| <b>Gamma Proteobacteria</b>   |                                         |                                                                                     |                   |                                                                                                                                                                                                              |
| Psy                           | <i>Pseudomonas syringae</i>             | NC_004578.1                                                                         | + 4771381 4771469 | <i>PSPTO4238</i> <a href="#">COG0715</a> <i>PSPTO4239</i> <a href="#">COG0600</a> <i>PSPTO4240</i> <a href="#">COG1116</a> <i>PSPTO4241</i> <a href="#">COG3665</a> <i>PSPTO4242</i> <a href="#">COG3665</a> |
| Pfl                           | <i>Pseudomonas fluorescens</i>          | NZ_AAAT020000050.1                                                                  | - 44662 44748     | <i>Pflu2166</i> <a href="#">COG0715</a> <i>Pflu2165</i> <a href="#">COG0600</a> <i>Pflu2164</i> <a href="#">COG1116</a> <i>Pflu2163</i> <a href="#">COG3665</a> <i>Pflu2162</i> <a href="#">COG3665</a>      |
| Ech                           | <i>Erwinia chrysanthemi</i>             | gnl TIGR_198628 contig:223                                                          | + 549581 549661   | - <a href="#">COG0715</a> ... ?                                                                                                                                                                              |
| Mde                           | <i>Microbulbifer degradans</i>          | NZ_AABI02000012.1                                                                   | + 100719 100778   | <i>Mdeg2136</i> <a href="#">COG0715</a> <i>Mdeg2137</i> <a href="#">COG0600</a> <i>Mdeg2138</i> <a href="#">COG1116</a> <i>Mdeg2139</i> <a href="#">COG3665</a> <i>Mdeg2140</i> <a href="#">COG3665</a>      |
| <b>Epsilon Proteobacteria</b> |                                         |                                                                                     |                   |                                                                                                                                                                                                              |
| Wsu                           | <i>Wolinella succinogenes</i>           | NC_005090.1                                                                         | + 1067291 1067378 | <i>WS1110</i> <a href="#">COG0715</a> <i>WS1111</i> <a href="#">COG0600</a> <i>WS1112</i> <a href="#">COG1116</a> <i>WS1113</i> <a href="#">COG3665</a> <i>WS1114</i> <a href="#">COG3665</a>                |
| COG                           | Gene                                    | Description                                                                         |                   |                                                                                                                                                                                                              |
| <a href="#">COG3665</a>       | <i>BS_ycgI</i>                          | Uncharacterized conserved protein                                                   |                   |                                                                                                                                                                                                              |
| <a href="#">COG2076</a>       | <i>emrE</i>                             | Membrane transporters of cations and cationic drugs                                 |                   |                                                                                                                                                                                                              |
| <a href="#">COG0715</a>       | <i>ssuA</i>                             | ABC-type nitrate/sulfonate/bicarbonate transport systems, periplasmic components    |                   |                                                                                                                                                                                                              |
| <a href="#">COG0600</a>       | <i>ssuC</i>                             | ABC-type nitrate/sulfonate/bicarbonate transport systems, permease component        |                   |                                                                                                                                                                                                              |
| <a href="#">COG1116</a>       | <i>ssuB</i>                             | ABC-type nitrate/sulfonate/bicarbonate transport systems, ATPase component          |                   |                                                                                                                                                                                                              |
| <a href="#">COG4770</a>       | -                                       | Acetyl/propionyl-CoA carboxylase, alpha subunit                                     |                   |                                                                                                                                                                                                              |
| <a href="#">COG0010</a>       | <i>speB</i>                             | Arginase/agmatinase/formiminoglutamate hydrolase, arginase family                   |                   |                                                                                                                                                                                                              |
| <a href="#">COG1984</a>       | <i>ybgK</i>                             | Allophanate hydrolase subunit 2                                                     |                   |                                                                                                                                                                                                              |
| <a href="#">COG1284</a>       | <i>BS_ydeO</i>                          | Uncharacterized conserved protein                                                   |                   |                                                                                                                                                                                                              |
| <a href="#">COG0154</a>       | <i>BS_yerM</i>                          | Asp-tRNAAsn/Glu-tRNA <sub>Gln</sub> amidotransferase A subunit and related amidases |                   |                                                                                                                                                                                                              |
| <a href="#">COG2252</a>       | <i>ygfQ</i>                             | Permeases                                                                           |                   |                                                                                                                                                                                                              |
| <a href="#">COG0531</a>       | <i>aniC</i>                             | Amino acid transporters                                                             |                   |                                                                                                                                                                                                              |
