# Supplementary material
Source: PubMed Central journal article supplement (PMC404060)

C

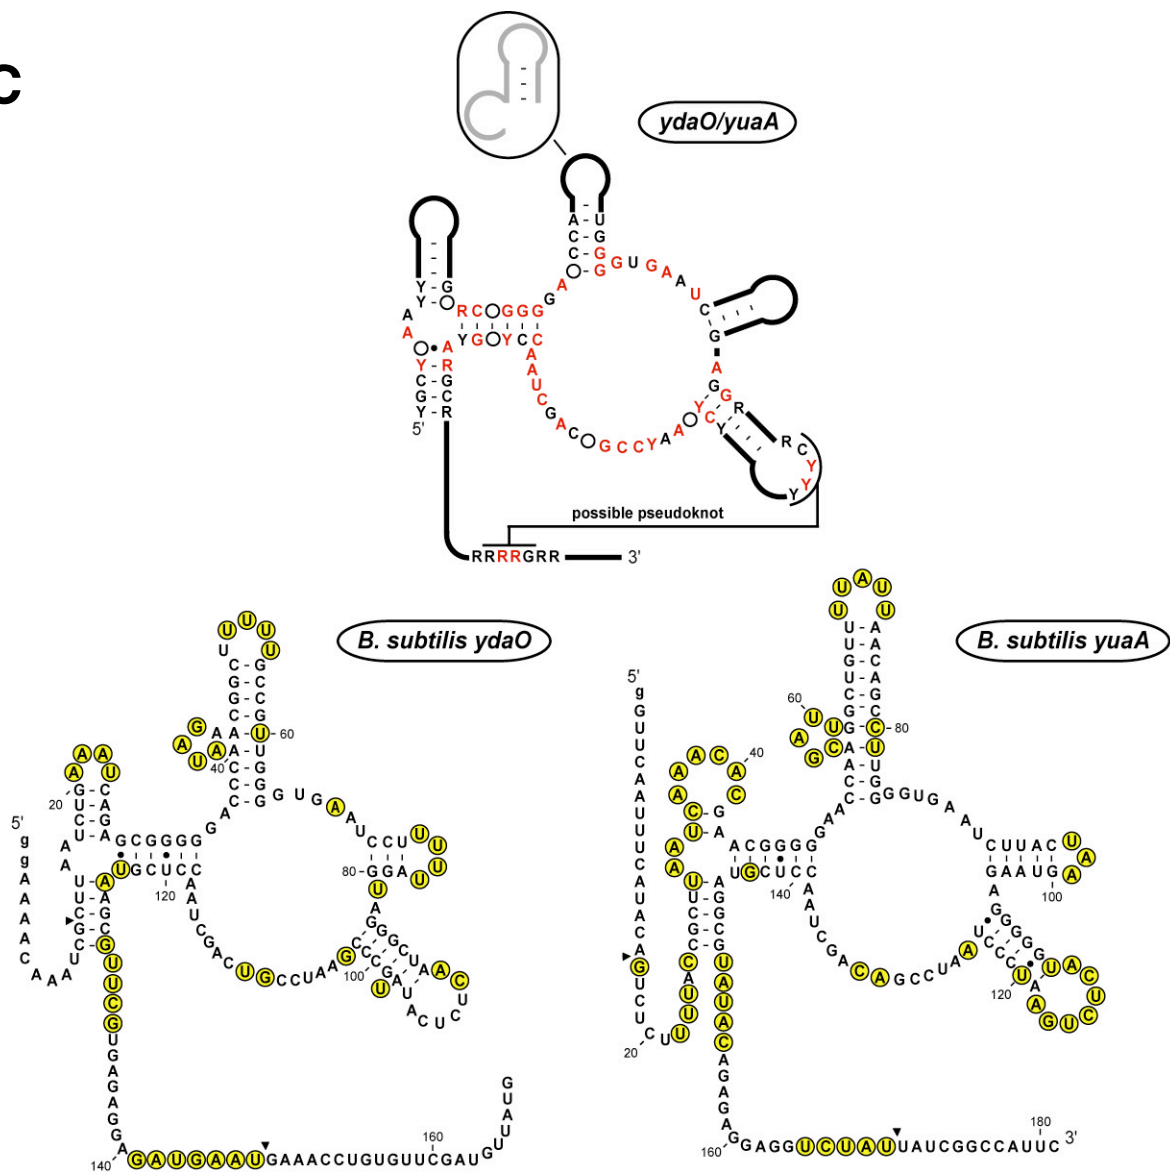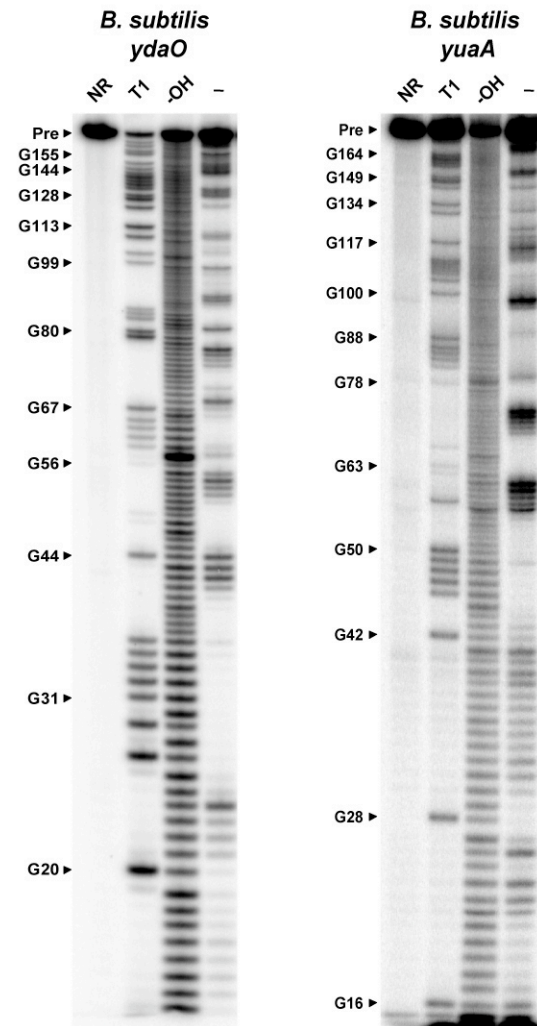

Supplement: pnas_101_17_6421__3.pdf [file pnas_101_17_6421__3.pdf]

C

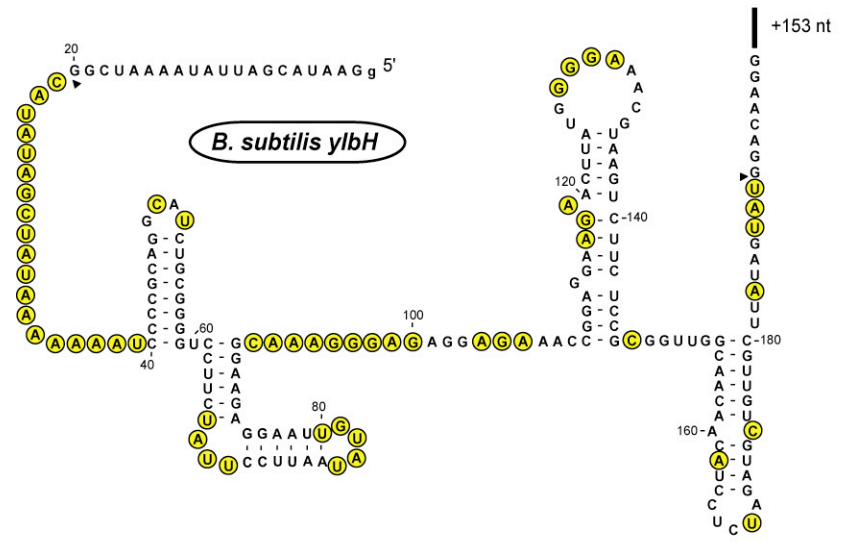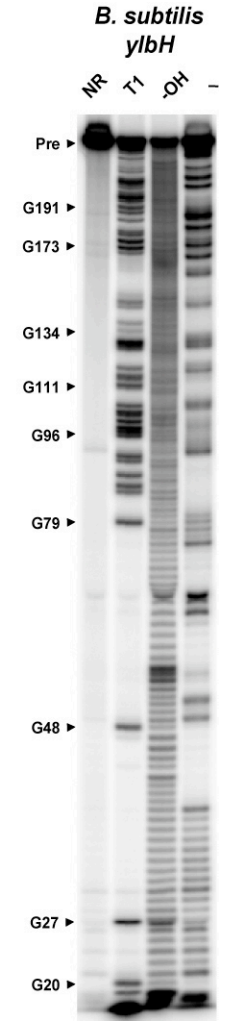

Supplement: pnas_101_17_6421__8.pdf [file pnas_101_17_6421__8.pdf]
